# Senescent cell-derived vaccines: a new concept towards an immune response against cancer and aging?

João Pessoa<sup>1</sup>, Sandrina Nóbrega-Pereira<sup>1</sup>, Bruno Bernardes de Jesus<sup>1</sup>

<sup>1</sup>Department of Medical Sciences and Institute of Biomedicine - iBiMED, University of Aveiro, Aveiro 3810-193, Portugal

**Correspondence to:** Bruno Bernardes de Jesus; email: [brunob.jesus@ua.pt](mailto:brunob.jesus@ua.pt)

**Keywords:** cancer, immunotherapy, tumor-associated senescent cells, senescence, antigen, vaccine

**Received:** November 20, 2023    **Accepted:** March 13, 2024    **Published:** June 26, 2024

**Copyright:** © 2024 Pessoa et al. This is an open access article distributed under the terms of the [Creative Commons Attribution License](https://creativecommons.org/licenses/by/4.0/) (CC BY 4.0), which permits unrestricted use, distribution, and reproduction in any medium, provided the original author and source are credited.

## ABSTRACT

Two recent seminal works have untangled the intricate role of tumor-associated senescent cells in cancer progression, or regression, by guiding our immune system against cancer cells. The characterization of these unique, yet diverse cell populations, should be considered, particularly when contemplating the use of senolytics, which are drugs that selectively eliminate senescent cells, in a cancer framework. Here, we will describe the current knowledge in this field. In particular, we will discuss how the presence of senescent cells in tumors could be used as a therapeutic target in immunogenic cancers and how we may hypothetically design an adaptive anti-aging vaccine.

## INTRODUCTION

Senescent cells have been widely characterized [1–5]. Different research lines have extensively demonstrated that senescent cells accumulate in different tissues during aging, where they guide the aging process through local and systemic signals. While aging is characterized by an accumulation of senescent cells associated with a loss of tissue fitness, senescence per se is a strong barrier to tumor progression [6–8]. These findings hold exciting promise in the combat of both cancer and aging. In fact, expression of tumor-suppressor factors (Sp53/Sp16/SArf), was shown per se to increase the lifespan of rodents, supporting the hypothesis that the benefits of senescence may outweigh the deleterious effects of its accumulation later in age, at least in small rodents [9, 10]. This may relate to a protective background in a cancer-prone model such as the WT C57BL/6 mice in ad libitum diet [11].

Induction of senescence, triggered by internal or external signals, results in a committed cell cycle arrest. Oncogenic induced senescence (OIS), originally observed as a strong barrier against cancer (and initially described after H-RasG12V expression in IMR-90 cells),

presents sustained expression of p16 and p53 activation, something also observed during replicative induced senescence [7, 12–14].

Although one could not distinguish senescent tumor cells (STC) from non-tumoral senescent cells, it is suggested that STC are derived during cancer progression. Furthermore, current cancer treatments could generate senescent cells in the tumor vicinity. Radiotherapy, or other tumor-targeted therapies, have been shown to induce senescence in the tissues surrounding tumors, which have the capacity to fuel cancer progression [15] through mechanisms further explored in this review. Rather than senescent cells originated directly from tumor cells, the myriad of cell states around or within the tumor microenvironment is the guiding force of tumor-associated senescent cells (TASCs). Hereafter, we will use the term TASCs to refer to the different types of senescent cells coexisting in the core tumor and its vicinity.

How TASCs could be used to design novel anticancer strategies was recently addressed [16, 17]. Here, we will discuss the latest advances on our knowledge

concerning the capacity of senescent cells to guide the immune system towards different types of cancer. Furthermore, we will integrate this information with new anti-aging senolytic-based strategies.

### **TASCs have both tumor-suppressive and oncogenic impacts**

Senescence is evolutionarily regarded as a developmental anti-cancer program. However, this unique perception of senescence has been challenged by our improved understanding of the intricate role of senescent cells during the aging process. Depending on their background, TASCs can promote tumor growth and aggressiveness, or function as a strong barrier to cancer progression. DNA damage, oncogene activation and mutations in tumor suppressor genes may induce TASCs to prevent tumor formation [7, 18–20]. For instance, senescence induced by telomere dysfunction and oncogenic signaling (and further accelerated by oncogene-induced DNA replication stress) is a biological response of cells from human cancer precursor lesions and may work as a tumor-suppressive mechanism through cell cycle arrest [3, 21].

As opposed to their tumor-suppressive effects, TASCs may also have an oncogenic impact. The senescence-associated secretory phenotype (SASP) is an intercellular strategy employed by senescent cells to communicate with the surrounding tissues and to signal the senescence process, through the release of chemokines, cytokines, growth factors and enzymes [22]. Cellular stressors can activate the DNA damage response, which, when persistent, can induce transcription factors and signaling pathways that trigger SASP release and affect its composition [23, 24]. The SASP is regulated at the messenger RNA transcription, stability, translation, and secretion levels [24]. SASP components include cytokines (such as interleukin-6 [IL-6], tumor necrosis factor  $\alpha$ , tissue growth factor  $\beta$ , and others), chemokines (such as C-C motif ligand 2 and C-X-C motif ligand 2), bioactive lipids, reactive oxygen species (ROS), and noncoding DNA or RNA molecules [23]. In 30-70% senescent cells, the SASP contains molecules with pro-inflammatory, pro-apoptotic, and pro-fibrotic effects. In the remaining 70-30% senescent cells, the SASP is thought to contain growth and regenerative factors, which can possibly reduce the levels of apoptosis, fibrosis, and tissue destruction [23]. The SASP can also amplify its signals through autocrine and paracrine positive feedback loops [24]. Moreover, some SASP components can propagate senescence properties to neighboring or distant non-senescent cells [23].

Evidence suggests that the SASP could lead to an inflammatory microenvironment supporting tumor

progression and drug extrusion causing chemotherapy resistance. In these processes, IL-6, C-X-C motif chemokine ligand 10 and metalloproteinases 3/9 play pivotal roles [7, 25–31]. Supporting the oncogenic impact of TASCs, senescence was shown to support melanoma progression [32]. Furthermore, the increase of senescence and the inflammatory microenvironment triggered by the SASP was shown to facilitate renal cell carcinoma metastasis [33]. In mice, senescent dermal fibroblasts generated a SASP signature that promoted carcinoma growth after co-transplantation. Importantly, this response was observed only in immune-competent mice demonstrating the critical role of the immune system (in particular through IL-6) in the spreading of senescence signaling [29, 34].

The presence of senescent cells in cancer has been widely characterized. A body of preclinical studies globally demonstrates that cancer therapies (e.g. radiotherapy or chemotherapy) cause the accumulation of senescent cells, both in tumors (TASCs) and in the surrounding healthy tissues of the cancer patient. Because of the dual effect of senescent cells in cancer therapy, a two-step therapeutic approach has been proposed, in which radiation and chemotherapy induce senescence (with anticancer effects) and, subsequently, senescent cells are selectively cleared, to minimize tumor fueling [35]. These studies suggest that, for optimized cancer treatment, senescence should be transiently induced and subsequently eliminated.

Strategies to tackle senescent cells have been widely described [36, 37]. In this framework, the use of senolytics, which are compounds that specifically eliminate senescent cells by inducing their apoptosis, holds great promise in enhancing the effectiveness of cancer therapy and minimizing its side effects [38]. Senolytics are broadly divided into first and second-generation. First-generation senolytics are natural products with multiple molecular targets and include the anticancer agent dasatinib and the natural flavonoid quercetin. These compounds target ephrins 1/3 and phosphatidylinositol 3-kinase, respectively, which are critical for senescent cell survival [39]. Clinical trials in aging-related diseases, including heart, kidney, liver, muscular, and neurological diseases, have shown that the combined effects of these two compounds killed senescent cells [23]. Second-generation senolytics include compounds and nanoparticles activated through contact with the increased lysosomal content or increased senescence-associated  $\beta$ -galactosidase activity of senescent cells. Other second-generation senolytics include SASP inhibitors and inducers of sodium-potassium pump-dependent apoptosis [23]. Since senescence phenotypes are heterogeneous, senolytic effects are also heterogeneous, depending on the cell

type and the mechanism that triggered senescence. Therefore, the simultaneous use of more than one senolytic has been tested to tackle senescent cell heterogeneity [39]. Senolytic mechanisms include the triggering of the intrinsic pathway of apoptosis, by increasing p53 release or targeting anti-apoptotic members of the B-cell lymphoma protein 2 family. Other senolytic mechanisms include the simultaneous inhibition of multiple cellular pathways or the depletion of metabolites that are essential for senescent cell survival. Additional mechanisms include the aggravation of cellular stresses, such as destabilization of proteostasis, accumulation of ROS, or mitochondrial dysfunction. Since senescent cells are already under stress, these strategies can promote their selective elimination [39].

In a cancer framework, Patil and colleagues recently demonstrated that treatment of irradiated mice with a small molecule that tackles senescent cells (the senolytic agent ABT-737) was sufficient to reduce radiation-enhanced tumor growth through the control of the expression of 12-lipoxygenase (12-LOX), a molecule mediating the deleterious effects of senescence. These data demonstrate how radiation-induced senescence could support tumor growth, and identified a key component (12-LOX) of the oncogenic microenvironment [40]. Another compound, ABT-263, has demonstrated powerful senolytic activity against senescent breast cancer cells generated by radiation or chemotherapy [41]. Of note, several senolytic compounds are currently under clinical trials [42]. Moreover, senolytics are also promising in overcoming the decline in the immune fitness of the elderly, which is partially caused by immune cell senescence [43].

### **TASCs and other senescent cells share cancer antigens**

Marin et al. and Chen et al. have recently demonstrated how senescent cells could be used to guide the immune system against cancer [16, 17]. In fact, previous evidence demonstrated that TASCs could lead to the elimination of established tumors when injected into tumor-bearing mice, through the mobilization of an antitumoral cytotoxic T lymphocytes response [44]. This observation has been strengthened by recent studies. In cell lines derived from mouse models of melanoma and pancreatic carcinoma, TASCs were induced through the conjunction of radiotherapy and inhibition of DNA repair. These senescent cells were shown to express immunostimulatory cytokines that could activate cytotoxic T lymphocytes. When TASCs were injected into tumor-bearing mouse models, an antitumor immune response was generated, indicating that vaccination with senescent cells could halt tumor

growth [17]. Using a p53-restorable liver cancer model, Chen and colleagues corroborated previous findings and unveiled the paradoxical effect of senescent cells on tumor biology [16]. In their model, a combination of different SASP programs, in conjunction with differential IFN $\gamma$  outputs, was shown to influence the oncogenic and tumor-suppressive dual effect of senescence in (liver) cancer. In fact, different SASP programs may predict patient outcomes in ovarian and breast cancer through a differential modulation of a senescence program [45, 46]. These studies have improved our understanding of the impact of TASCs on cancer regression and potential relapse.

TASCs may also help training the immune system against cancer, revealing their adjuvant capacity. Liu and colleagues demonstrated that mouse colon and mammary carcinoma cell lines treated with radiation and veliparib to generate cancer senescent cells could induce the maturation of co-cultured dendritic cells, leading to efficient priming of cytotoxic T lymphocytes. Injecting these TASCs into tumor-bearing mice increased inflammation and suppressed tumor growth, enhancing the radiotherapy effect and blocking colonization by tumor cells [47]. TASCs could source a combination of immunostimulatory and immunosuppressive molecules, whose equilibrium may critically affect the outcome of immunotherapy [48]. MHC class I overexpression on TASCs depends on paracrine type I interferon signaling. TASCs are naturally antigenic, displaying antigens that can be targeted by CD8-positive T cells. Importantly, some of these antigens are exclusive of senescent cells.

Senescent cells can also release damage-associated molecular patterns, including ATP, at levels comparable to cells undergoing immunogenic cell death, being able to efficiently transfer antigens to dendritic cells. This ability suggests that inducing senescence of tumor cells would significantly enhance their adjuvanticity. Senescent melanoma and pancreatic cancer cells transplanted into immunocompetent mice prevented tumor development upon re-inoculation with identical proliferating cancer cell types. Nevertheless, when tumors were already established, inoculation with senescent cancer cells could delay, but not fully stop, tumor progression. Moreover, the induction of senescence in four distinct patient-derived primary cancer cells lines resulted in high levels of stimulation of their own tumor-infiltrating lymphocytes, with anticancer effects by enhancing the immunogenicity of these cancer cells [17, 48]. These effects were critically mediated by the enrichment of TASCs and senescent cells in unique peptides, which were able to activate strong immune responses.

The above-mentioned studies demonstrate that TASCs could effectively repurpose the immune system against cancer cells. Therefore, it is likely that TASCs can also guide the immune system against other types of senescent cells, with a potential impact on the aging process.

### Cancer immunotherapy could also be anti-aging

Senescent cells are directly related to aging and aging-related diseases. As such, their selective targeting would be an asset for the prevention and treatment of those diseases. Moreover, as discussed in the previous sections, the dual role of TASCs in cancer therapy raises the convenience of their removal after transient exposure to the tumor microenvironment. From these concepts, an immunotherapeutic approach for the selective elimination of senescent cells would be convenient.

Currently available immunotherapeutic approaches are generally not indicated to be selective for TASCs. For example, many immunotherapy approaches are available for breast cancer [49] including different subtypes such as triple-negative breast cancer [50]. None of those immunotherapy approaches seems to have been designed to specifically target TASCs, which have shown increased resistance to immunotherapy [51]. Whether cancer immunotherapy approaches can selectively target senescent cells is an aspect that is generally poorly discussed in the literature. Interestingly, two of the most valuable immunotherapy targets, programmed death-ligand 1 (PD-L1) and cytotoxic T lymphocyte antigen 4 (CTLA4) [52], are positively correlated with senescence. PD-L1 is upregulated in senescent cells [53], which accumulate with aging and have increased resistance to immune surveillance [54]. Moreover, CTL4 was shown to be

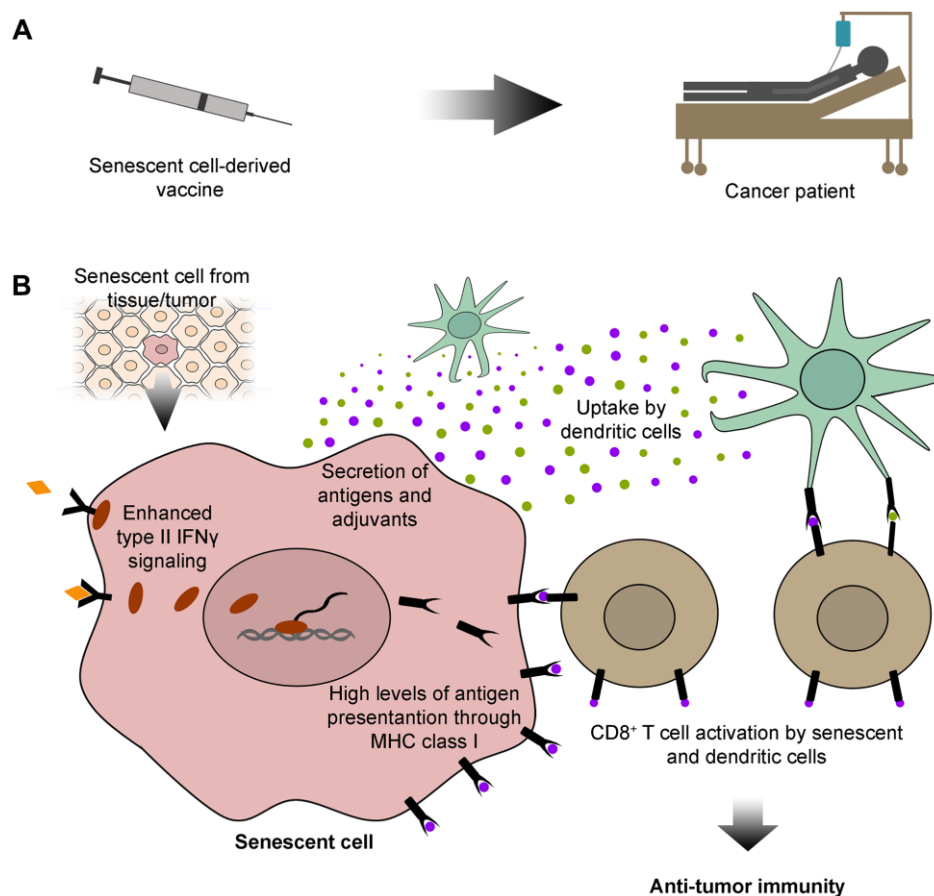

**Figure 1. Senescent cell-derived vaccines: sources of specific antigens for cancer immunotherapy.** (A) Here, we propose that senescent cells could be exploited for developing immunotherapeutic vaccines for cancer patients. (B) Senescent cells used in the development of these vaccines could be isolated from tissues or tumors. Senescent cells have outstanding features that could be exploited for cancer immunotherapy. These include high levels of type II interferon  $\gamma$  (IFN $\gamma$ ) signaling, which lead to abundant antigen presentation on the cell surface, through the major histocompatibility complex (MHC) class I. Senescent cells also secrete a vast array of antigens and adjuvants, which can be internalized and subsequently displayed by dendritic cells. Both senescent and dendritic cells can further activate CD8<sup>+</sup> T cells with antigens common to senescent and cancer cells, empowering CD8<sup>+</sup> T cells with an anti-tumor immune capacity.

upregulated in aged human individuals [55]. As such, immunotherapies targeting PD-L1 or CTL4 may also have some specificity against senescent cells.

A major limitation of cancer immunotherapies is the risk of senescence of their effector cells, which compromises their therapeutic role. The chimeric antigen receptor T (CAR-T) and the T cell receptor-engineered T (TCR-T) cell therapies are two successful immunotherapy approaches that exploit T cells. One of their major limitations is the risk of T cell senescence, for which strategies to reverse senescence have been tested [56]. Senescent T cells have been proposed as potential targets for cancer immunotherapy, through the prevention or reversal of their senescent state [57]. Therefore, the development of senescence-specific immunotherapies would be also beneficial to already available cancer immunotherapies.

Importantly, some strategies are already available to induce the selective elimination of senescent cells. In mice, CD4<sup>+</sup> T cells were able to target oncogene-induced senescent hepatocytes through MHC-II recognition [58]. Also in mice, natural killer cells could eliminate senescent fibroblasts through the recognition of the NKG2D receptor on their surface [59]. These findings encourage the development of cost-effective senescent cell-specific immunotherapy approaches [42].

## CONCLUSION

The exploitation of the patient's immune system to eliminate cancer cells has long been tested through the development of innovative strategies with remarkable success and high expectations [60–66]. Our growing understanding of the immune system has allowed the design of novel anticancer therapies. However, tumor cells are generally poor antigen-presenting cells, evading the immune response in early stages of the pathophysiology [67] and restricting immunotherapeutic efficacy to only a minor group of cancers [68, 69]. Nevertheless, targeting of senescent cells in the context of cancer and aging may upsurge as an alternative to this critical limitation, through the selective activation of a T cell-specific response against senescent cells within the tumor or its vicinity.

Recent evidence supports the use of TASCs as sources of peptide antigens and adjuvants for anticancer vaccine development (Figure 1A). Their SASP provides abundant release of stimulatory cytokines, which, in conjunction with high levels of antigen presentation, generates a robust tumor specific T cell response (Figure 1B). As discussed here, this approach will potentiate their adjuvanticity in cancer targeting, allowing the design of stronger and directed immunotherapeutic strategies.

Moreover, since cancer and senescent cells share common antigens, this immunotherapeutic approach could also be effective against aging and age-related diseases. Therefore, cancer immunotherapy based on TASCs and other types of senescent cells may achieve exciting outcomes beyond cancer therapy.

## ACKNOWLEDGMENTS

We thank members of the Bruno Bernardes de Jesus and Sandrina Nóbrega-Pereira laboratories for insightful discussions and advice.

## CONFLICTS OF INTEREST

The authors declare no competing interests.

## FUNDING

This work was supported by Fundação para a Ciência e a Tecnologia (FCT) and FEDER, through the Institute of Biomedicine - iBiMED grants UIDP/04501/2020 and UIDB/04501/2020, and the project grants EXPL/BIA-CEL/0358/2021, 2022.01199.PTDC, and LISBOA-01-0145-FEDER-007391 (a project cofunded by FEDER, through POR Lisboa 2020 - Programa Operacional Regional de Lisboa, PORTUGAL 2020, and FCT). We acknowledge additional funding from Bolsa de Investigação em Oncologia Dr. Dário Cruz, from the Núcleo Regional do Centro da Liga Portuguesa Contra o Cancro, 2023. S.N.-P. received funding from the FCT CEECIND Program (2020.00355.CEECIND).

## REFERENCES

1. Baker DJ, Childs BG, Durik M, Wijers ME, Sieben CJ, Zhong J, Saltness RA, Jeganathan KB, Verzosa GC, Pezeszki A, Khazaie K, Miller JD, van Deursen JM. Naturally occurring p16(Ink4a)-positive cells shorten healthy lifespan. *Nature*. 2016; 530:184–9. <https://doi.org/10.1038/nature16932> PMID:[26840489](https://pubmed.ncbi.nlm.nih.gov/26840489/)
2. Collado M, Serrano M. The power and the promise of oncogene-induced senescence markers. *Nat Rev Cancer*. 2006; 6:472–6. <https://doi.org/10.1038/nrc1884> PMID:[16723993](https://pubmed.ncbi.nlm.nih.gov/16723993/)
3. Bernardes de Jesus B, Blasco MA. Assessing cell and organ senescence biomarkers. *Circ Res*. 2012; 111:97–109. <https://doi.org/10.1161/CIRCRESAHA.111.247866> PMID:[22723221](https://pubmed.ncbi.nlm.nih.gov/22723221/)
4. Ben-Porath I, Weinberg RA. When cells get stressed: an integrative view of cellular senescence. *J Clin Invest*. 2004; 113:8–13.

- <https://doi.org/10.1172/JCI20663> PMID:[14702100](https://pubmed.ncbi.nlm.nih.gov/14702100/)
5. Collado M, Blasco MA, Serrano M. Cellular senescence in cancer and aging. *Cell*. 2007; 130:223–33. <https://doi.org/10.1016/j.cell.2007.07.003> PMID:[17662938](https://pubmed.ncbi.nlm.nih.gov/17662938/)
  6. Wang L, Lankhorst L, Bernards R. Exploiting senescence for the treatment of cancer. *Nat Rev Cancer*. 2022; 22:340–55. <https://doi.org/10.1038/s41568-022-00450-9> PMID:[35241831](https://pubmed.ncbi.nlm.nih.gov/35241831/)
  7. Huang W, Hickson LJ, Eirin A, Kirkland JL, Lerman LO. Cellular senescence: the good, the bad and the unknown. *Nat Rev Nephrol*. 2022; 18:611–27. <https://doi.org/10.1038/s41581-022-00601-z> PMID:[35922662](https://pubmed.ncbi.nlm.nih.gov/35922662/)
  8. Wyld L, Bellantuono I, Tchkonja T, Morgan J, Turner O, Foss F, George J, Danson S, Kirkland JL. Senescence and Cancer: A Review of Clinical Implications of Senescence and Senotherapies. *Cancers (Basel)*. 2020; 12:2134. <https://doi.org/10.3390/cancers12082134> PMID:[32752135](https://pubmed.ncbi.nlm.nih.gov/32752135/)
  9. Tomás-Loba A, Flores I, Fernández-Marcos PJ, Cayuela ML, Maraver A, Tejera A, Borrás C, Matheu A, Klatt P, Flores JM, Viña J, Serrano M, Blasco MA. Telomerase reverse transcriptase delays aging in cancer-resistant mice. *Cell*. 2008; 135:609–22. <https://doi.org/10.1016/j.cell.2008.09.034> PMID:[19013273](https://pubmed.ncbi.nlm.nih.gov/19013273/)
  10. Krishnamurthy J, Ramsey MR, Ligon KL, Torrice C, Koh A, Bonner-Weir S, Sharpless NE. p16INK4a induces an age-dependent decline in islet regenerative potential. *Nature*. 2006; 443:453–7. <https://doi.org/10.1038/nature05092> PMID:[16957737](https://pubmed.ncbi.nlm.nih.gov/16957737/)
  11. Blackwell BN, Bucci TJ, Hart RW, Turturro A. Longevity, body weight, and neoplasia in ad libitum-fed and diet-restricted C57BL6 mice fed NIH-31 open formula diet. *Toxicol Pathol*. 1995; 570–82. <https://doi.org/10.1177/019262339502300503> PMID:[8578100](https://pubmed.ncbi.nlm.nih.gov/8578100/)
  12. Lin AW, Barradas M, Stone JC, van Aelst L, Serrano M, Lowe SW. Premature senescence involving p53 and p16 is activated in response to constitutive MEK/MAPK mitogenic signaling. *Genes Dev*. 1998; 12:3008–19. <https://doi.org/10.1101/gad.12.19.3008> PMID:[9765203](https://pubmed.ncbi.nlm.nih.gov/9765203/)
  13. Serrano M, Lin AW, McCurrach ME, Beach D, Lowe SW. Oncogenic ras provokes premature cell senescence associated with accumulation of p53 and p16INK4a. *Cell*. 1997; 88:593–602. [https://doi.org/10.1016/s0092-8674\(00\)81902-9](https://doi.org/10.1016/s0092-8674(00)81902-9) PMID:[9054499](https://pubmed.ncbi.nlm.nih.gov/9054499/)
  14. Victorelli S, Passos JF. Telomeres and Cell Senescence - Size Matters Not. *EBioMedicine*. 2017; 21:14–20. <https://doi.org/10.1016/j.ebiom.2017.03.027> PMID:[28347656](https://pubmed.ncbi.nlm.nih.gov/28347656/)
  15. Piskorz WM, Cechowska-Pasko M. Senescence of Tumor Cells in Anticancer Therapy-Beneficial and Detrimental Effects. *Int J Mol Sci*. 2022; 23:11082. <https://doi.org/10.3390/ijms231911082> PMID:[36232388](https://pubmed.ncbi.nlm.nih.gov/36232388/)
  16. Chen HA, Ho YJ, Mezzadra R, Adrover JM, Smolkin R, Zhu C, Woess K, Bernstein N, Schmitt G, Fong L, Luan W, Wuest A, Tian S, et al. Senescence Rewires Microenvironment Sensing to Facilitate Antitumor Immunity. *Cancer Discov*. 2023; 13:432–53. <https://doi.org/10.1158/2159-8290.CD-22-0528> PMID:[36302222](https://pubmed.ncbi.nlm.nih.gov/36302222/)
  17. Marin I, Boix O, Garcia-Garijo A, Sirois I, Caballe A, Zarzuela E, Ruano I, Attolini CS, Prats N, López-Domínguez JA, Kovatcheva M, Garralda E, Muñoz J et al. Cellular Senescence Is Immunogenic and Promotes Antitumor Immunity. *Cancer Discov*. 2023; 13:410–31. <https://doi.org/10.1158/2159-8290.CD-22-0523> PMID:[36302218](https://pubmed.ncbi.nlm.nih.gov/36302218/)
  18. Bartkova J, Horejsí Z, Koed K, Krämer A, Tort F, Zieger K, Guldborg P, Sehested M, Nesland JM, Lukas C, Ørntoft T, Lukas J, Bartek J. DNA damage response as a candidate anti-cancer barrier in early human tumorigenesis. *Nature*. 2005; 434:864–70. <https://doi.org/10.1038/nature03482> PMID:[15829956](https://pubmed.ncbi.nlm.nih.gov/15829956/)
  19. Trost TM, Lausch EU, Fees SA, Schmitt S, Enklaar T, Reutzel D, Brixel LR, Schmidtke P, Maringer M, Schiffer IB, Heimerdinger CK, Hengstler JG, Fritz G, et al. Premature senescence is a primary fail-safe mechanism of ERBB2-driven tumorigenesis in breast carcinoma cells. *Cancer Res*. 2005; 65:840–9. <https://doi.org/10.1158/0008-5472.840.65.3> PMID:[15705882](https://pubmed.ncbi.nlm.nih.gov/15705882/)
  20. Alimonti A, Nardella C, Chen Z, Clohessy JG, Carracedo A, Trotman LC, Cheng K, Varmeh S, Kozma SC, Thomas G, Rosivatz E, Wscholski R, Cognetti F, et al. A novel type of cellular senescence that can be enhanced in mouse models and human tumor xenografts to suppress prostate tumorigenesis. *J Clin Invest*. 2010; 120:681–93. <https://doi.org/10.1172/JCI40535> PMID:[20197621](https://pubmed.ncbi.nlm.nih.gov/20197621/)
  21. Suram A, Kaplunov J, Patel PL, Ruan H, Cerutti A, Boccardi V, Fumagalli M, Di Micco R, Mirani N, Gurung RL, Hande MP, d’Adda di Fagagna F, Herbig U. Oncogene-induced telomere dysfunction enforces cellular senescence in human cancer precursor lesions. *EMBO J*. 2012; 31:2839–51. <https://doi.org/10.1038/emboj.2012.132>

- PMID:[22569128](#)
22. Schmitt CA, Wang B, Demaria M. Senescence and cancer - role and therapeutic opportunities. *Nat Rev Clin Oncol*. 2022; 19:619–636.  
<https://doi.org/10.1038/s41571-022-00668-4>  
PMID:[36045302](#)
  23. Chaib S, Tchkonja T, Kirkland JL. Cellular senescence and senolytics: the path to the clinic. *Nat Med*. 2022; 28:1556–68.  
<https://doi.org/10.1038/s41591-022-01923-y>  
PMID:[35953721](#)
  24. Cuollo L, Antonangeli F, Santoni A, Soriani A. The Senescence-Associated Secretory Phenotype (SASP) in the Challenging Future of Cancer Therapy and Age-Related Diseases. *Biology (Basel)*. 2020; 9:485.  
<https://doi.org/10.3390/biology9120485>  
PMID:[33371508](#)
  25. Georgilis A, Klotz S, Hanley CJ, Herranz N, Weirich B, Morancho B, Leote AC, D'Artista L, Gallage S, Seehawer M, Carroll T, Dharmalingam G, Wee KB, et al. PTBP1-Mediated Alternative Splicing Regulates the Inflammatory Secretome and the Pro-tumorigenic Effects of Senescent Cells. *Cancer Cell*. 2018; 34:85–102.e9.  
<https://doi.org/10.1016/j.ccell.2018.06.007>  
PMID:[29990503](#)
  26. Yang G, Rosen DG, Zhang Z, Bast RC Jr, Mills GB, Colacino JA, Mercado-Uribe I, Liu J. The chemokine growth-regulated oncogene 1 (Gro-1) links RAS signaling to the senescence of stromal fibroblasts and ovarian tumorigenesis. *Proc Natl Acad Sci USA*. 2006; 103:16472–7.  
<https://doi.org/10.1073/pnas.0605752103>  
PMID:[17060621](#)
  27. Alimirah F, Pulido T, Valdovinos A, Alptekin S, Chang E, Jones E, Diaz DA, Flores J, Velarde MC, Demaria M, Davalos AR, Wiley CD, Limbad C, et al. Cellular Senescence Promotes Skin Carcinogenesis through p38MAPK and p44/42MAPK Signaling. *Cancer Res*. 2020; 80:3606–19.  
<https://doi.org/10.1158/0008-5472.CAN-20-0108>  
PMID:[32641409](#)
  28. Alspach E, Flanagan KC, Luo X, Ruhland MK, Huang H, Pazolli E, Donlin MJ, Marsh T, Piwnica-Worms D, Monahan J, Novack DV, McAllister SS, Stewart SA. p38MAPK plays a crucial role in stromal-mediated tumorigenesis. *Cancer Discov*. 2014; 4:716–29.  
<https://doi.org/10.1158/2159-8290.CD-13-0743>  
PMID:[24670723](#)
  29. Ruhland MK, Loza AJ, Capietto AH, Luo X, Knolhoff BL, Flanagan KC, Belt BA, Alspach E, Leahy K, Luo J, Schaffer A, Edwards JR, Longmore G, et al. Stromal senescence establishes an immunosuppressive microenvironment that drives tumorigenesis. *Nat Commun*. 2016; 7:11762.  
<https://doi.org/10.1038/ncomms11762>  
PMID:[27272654](#)
  30. Okamura K, Suzuki T, Nohara K. Gestational arsenite exposure augments hepatic tumors of C3H mice by promoting senescence in F1 and F2 offspring via different pathways. *Toxicol Appl Pharmacol*. 2020; 408:115259.  
<https://doi.org/10.1016/j.taap.2020.115259>  
PMID:[33010264](#)
  31. Muñoz-Galván S, Lucena-Cacace A, Perez M, Otero-Albiol D, Gomez-Cambronero J, Carnero A. Tumor cell-secreted PLD increases tumor stemness by senescence-mediated communication with microenvironment. *Oncogene*. 2019; 38:1309–23.  
<https://doi.org/10.1038/s41388-018-0527-2>  
PMID:[30305726](#)
  32. Guan X, LaPak KM, Hennessey RC, Yu CY, Shakya R, Zhang J, Burd CE. Stromal Senescence By Prolonged CDK4/6 Inhibition Potentiates Tumor Growth. *Mol Cancer Res*. 2017; 15:237–49.  
<https://doi.org/10.1158/1541-7786.MCR-16-0319>  
PMID:[28039358](#)
  33. Kamal Y, Cheng C, Frost HR, Amos CI. Predictors of disease aggressiveness influence outcome from immunotherapy treatment in renal clear cell carcinoma. *Oncoimmunology*. 2018; 8:e1500106.  
<https://doi.org/10.1080/2162402X.2018.1500106>  
PMID:[30546942](#)
  34. Gabai Y, Assouline B, Ben-Porath I. Senescent stromal cells: roles in the tumor microenvironment. *Trends Cancer*. 2023; 9:28–41.  
<https://doi.org/10.1016/j.trecan.2022.09.002>  
PMID:[36208990](#)
  35. Prasanna PG, Citrin DE, Hildesheim J, Ahmed MM, Venkatachalam S, Riscuta G, Xi D, Zheng G, Deursen JV, Goronzy J, Kron SJ, Anscher MS, Sharpless NE, et al. Therapy-Induced Senescence: Opportunities to Improve Anticancer Therapy. *J Natl Cancer Inst*. 2021; 113:1285–98.  
<https://doi.org/10.1093/jnci/djab064> PMID:[33792717](#)  
Erratum in: *J Natl Cancer Inst*. 2023; 115:235.  
<https://doi.org/10.1093/jnci/djac225> PMID:[36519712](#)
  36. Gasek NS, Kuchel GA, Kirkland JL, Xu M. Strategies for Targeting Senescent Cells in Human Disease. *Nat Aging*. 2021; 1:870–9.  
<https://doi.org/10.1038/s43587-021-00121-8>  
PMID:[34841261](#)
  37. Ovadya Y, Krizhanovsky V. Strategies targeting cellular senescence. *J Clin Invest*. 2018; 128:1247–54.  
<https://doi.org/10.1172/JCI95149>

PMID:[29608140](#)

38. Malayaperumal S, Marotta F, Kumar MM, Somasundaram I, Ayala A, Pinto MM, Banerjee A, Pathak S. The Emerging Role of Senotherapy in Cancer: A Comprehensive Review. *Clin Pract*. 2023; 13:838–52. <https://doi.org/10.3390/clinpract13040076> PMID:[37489425](#)
39. Rad AN, Grillari J. Current senolytics: Mode of action, efficacy and limitations, and their future. *Mech Ageing Dev*. 2024; 217:111888. <https://doi.org/10.1016/j.mad.2023.111888> PMID:[38040344](#)
40. Patil S, Reedy JL, Scroggins BT, White AO, Kwon S, Shankavaram U, López-Coral A, Chung EJ, Citrin DE. Senescence-associated tumor growth is promoted by 12-Lipoxygenase. *Aging (Albany NY)*. 2022; 14:1068–86. <https://doi.org/10.18632/aging.203890> PMID:[35158337](#)
41. Saleh T, Carpenter VJ, Tyutyunyk-Massey L, Murray G, Levenson JD, Souers AJ, Alotaibi MR, Faber AC, Reed J, Harada H, Gewirtz DA. Clearance of therapy-induced senescent tumor cells by the senolytic ABT-263 via interference with BCL-X<sub>L</sub>-BAX interaction. *Mol Oncol*. 2020; 14:2504–19. <https://doi.org/10.1002/1878-0261.12761> PMID:[32652830](#)
42. Billimoria R, Bhatt P. Senescence in cancer: Advances in detection and treatment modalities. *Biochem Pharmacol*. 2023; 215:115739. <https://doi.org/10.1016/j.bcp.2023.115739> PMID:[37562510](#)
43. Du PY, Gandhi A, Bawa M, Gromala J. The ageing immune system as a potential target of senolytics. *Oxf Open Immunol*. 2023; 4:iqad004. <https://doi.org/10.1093/oxfimm/iqad004> PMID:[37255929](#)
44. Meng Y, Efimova EV, Hamzeh KW, Darga TE, Mauceri HJ, Fu YX, Kron SJ, Weichselbaum RR. Radiation-inducible immunotherapy for cancer: senescent tumor cells as a cancer vaccine. *Mol Ther*. 2012; 20:1046–55. <https://doi.org/10.1038/mt.2012.19> PMID:[22334019](#)
45. Paffenholz SV, Salvagno C, Ho YJ, Limjoco M, Baslan T, Tian S, Kulick A, de Stanchina E, Wilkinson JE, Barriga FM, Zamarin D, Cubillos-Ruiz JR, Leibold J, Lowe SW. Senescence induction dictates response to chemo- and immunotherapy in preclinical models of ovarian cancer. *Proc Natl Acad Sci USA*. 2022; 119:e2117754119. <https://doi.org/10.1073/pnas.2117754119> PMID:[35082152](#)
46. Fleury H, Malaquin N, Tu V, Gilbert S, Martinez A, Olivier MA, Sauriol SA, Communal L, Leclerc-Desaulniers K, Carmona E, Provencher D, Mes-Masson AM, Rodier F. Exploiting interconnected synthetic lethal interactions between PARP inhibition and cancer cell reversible senescence. *Nat Commun*. 2019; 10:2556. <https://doi.org/10.1038/s41467-019-10460-1> PMID:[31186408](#)  
Erratum in: *Nat Commun*. 2024; 15:4011. <https://doi.org/10.1038/s41467-024-48270-9> PMID:[38740764](#)
47. Liu Y, Pagacz J, Wolfgeher DJ, Bromerg KD, Gorman JV, Kron SJ. Senescent cancer cell vaccines induce cytotoxic T cell responses targeting primary tumors and disseminated tumor cells. *J Immunother Cancer*. 2023; 11:e005862. <https://doi.org/10.1136/jitc-2022-005862> PMID:[36792123](#)
48. Marin I, Serrano M, Pietrocola F. Cellular senescence enhances adaptive anticancer immunosurveillance. *Oncoimmunology*. 2022; 12:2154115. <https://doi.org/10.1080/2162402X.2022.2154115> PMID:[36531690](#)
49. Keshavarz S, Wall JR, Keshavarz S, Vojoudi E, Jafari-Shakib R. Breast cancer immunotherapy: a comprehensive review. *Clin Exp Med*. 2023; 23:4431–47. <https://doi.org/10.1007/s10238-023-01177-z> PMID:[37658246](#)
50. Liu Y, Hu Y, Xue J, Li J, Yi J, Bu J, Zhang Z, Qiu P, Gu X. Advances in immunotherapy for triple-negative breast cancer. *Mol Cancer*. 2023; 22:145. <https://doi.org/10.1186/s12943-023-01850-7> PMID:[37660039](#)  
Erratum in: *Mol Cancer*. 2023; 22:154. <https://doi.org/10.1186/s12943-023-01858-z> PMID:[37710293](#)
51. Oesterreich S, Aird KM. Senescence and Immunotherapy: Redundant Immunomodulatory Pathways Promote Resistance. *Cancer Immunol Res*. 2023; 11:401–4. <https://doi.org/10.1158/2326-6066.CIR-23-0051> PMID:[36826438](#)
52. Waldman AD, Fritz JM, Lenardo MJ. A guide to cancer immunotherapy: from T cell basic science to clinical practice. *Nat Rev Immunol*. 2020; 20:651–68. <https://doi.org/10.1038/s41577-020-0306-5> PMID:[32433532](#)
53. Onorati A, Havas AP, Lin B, Rajagopal J, Sen P, Adams PD, Dou Z. Upregulation of PD-L1 in Senescence and Aging. *Mol Cell Biol*. 2022; 42:e0017122. <https://doi.org/10.1128/mcb.00171-22> PMID:[36154662](#)
54. Wang TW, Johmura Y, Suzuki N, Omori S, Migita T,



- Yamaguchi K, Hatakeyama S, Yamazaki S, Shimizu E, Imoto S, Furukawa Y, Yoshimura A, Nakanishi M. Blocking PD-L1-PD-1 improves senescence surveillance and ageing phenotypes. *Nature*. 2022; 611:358–64. <https://doi.org/10.1038/s41586-022-05388-4> PMID:36323784
55. Leng Q, Bentwich Z, Borkow G. CTLA-4 upregulation during aging. *Mech Ageing Dev*. 2002; 123:1419–21. [https://doi.org/10.1016/s0047-6374\(02\)00077-5](https://doi.org/10.1016/s0047-6374(02)00077-5) PMID:12297345
56. Kasakovski D, Xu L, Li Y. T cell senescence and CAR-T cell exhaustion in hematological malignancies. *J Hematol Oncol*. 2018; 11:91. <https://doi.org/10.1186/s13045-018-0629-x> PMID:29973238
57. Zhang J, He T, Xue L, Guo H. Senescent T cells: a potential biomarker and target for cancer therapy. *EBioMedicine*. 2021; 68:103409. <https://doi.org/10.1016/j.ebiom.2021.103409> PMID:34049248
58. Kang TW, Yevsa T, Woller N, Hoenicke L, Wuestefeld T, Dauch D, Hohmeyer A, Gereke M, Rudalska R, Potapova A, Iken M, Vucur M, Weiss S, Heikenwalder M, et al. Senescence surveillance of pre-malignant hepatocytes limits liver cancer development. *Nature*. 2011; 479:547–51. <https://doi.org/10.1038/nature10599> PMID:22080947
59. Sagiv A, Burton DGA, Moshayev Z, Vadai E, Wensveen F, Ben-Dor S, Golani O, Polic B, Krizhanovsky V. NKG2D ligands mediate immunosurveillance of senescent cells. *Aging (Albany NY)*. 2016; 8:328–44. <https://doi.org/10.18632/aging.100897> PMID:26878797
60. Dart A. New targets for cancer immunotherapy. *Nat Rev Cancer*. 2018; 18:667. <https://doi.org/10.1038/s41568-018-0067-7> PMID:30310145
61. Restifo NP, Dudley ME, Rosenberg SA. Adoptive immunotherapy for cancer: harnessing the T cell response. *Nat Rev Immunol*. 2012; 12:269–81. <https://doi.org/10.1038/nri3191> PMID:22437939
62. Riley RS, June CH, Langer R, Mitchell MJ. Delivery technologies for cancer immunotherapy. *Nat Rev Drug Discov*. 2019; 18:175–96. <https://doi.org/10.1038/s41573-018-0006-z> PMID:30622344
63. Eggermont LJ, Paulis LE, Tel J, Figdor CG. Towards efficient cancer immunotherapy: advances in developing artificial antigen-presenting cells. *Trends Biotechnol*. 2014; 32:456–65. <https://doi.org/10.1016/j.tibtech.2014.06.007> PMID:24998519
64. Kooreman NG, Kim Y, de Almeida PE, Termglinchan V, Diecke S, Shao NY, Wei TT, Yi H, Dey D, Nelakanti R, Brouwer TP, Paik DT, Sagiv-Barfi I, et al. Autologous iPSC-Based Vaccines Elicit Anti-tumor Responses *In Vivo*. *Cell Stem Cell*. 2018; 22:501–13.e7. <https://doi.org/10.1016/j.stem.2018.01.016> PMID:29456158
65. Hailemichael Y, Singh M, Overwijk W. Vaccinating with Stem Cells to Stop Cancer. *Trends Mol Med*. 2018; 24:524–6. <https://doi.org/10.1016/j.molmed.2018.04.006> PMID:29731352
66. Bernardes de Jesus B, Neves BM, Ferreira M, Nóbrega-Pereira S. Strategies for Cancer Immunotherapy Using Induced Pluripotency Stem Cells-Based Vaccines. *Cancers (Basel)*. 2020; 12:3581. <https://doi.org/10.3390/cancers12123581> PMID:33266109
67. Wolf Y, Bartok O, Patkar S, Eli GB, Cohen S, Litchfield K, Levy R, Jiménez-Sánchez A, Trabish S, Lee JS, Karathia H, Barnea E, Day CP, et al. UVB-Induced Tumor Heterogeneity Diminishes Immune Response in Melanoma. *Cell*. 2019; 179:219–35.e21. <https://doi.org/10.1016/j.cell.2019.08.032> PMID:31522890
68. Chiriva-Internati M, Bot A. A new era in cancer immunotherapy: discovering novel targets and reprogramming the immune system. *Int Rev Immunol*. 2015; 34:101–3. <https://doi.org/10.3109/08830185.2015.1015888> PMID:25901856
69. Yang Y. Cancer immunotherapy: harnessing the immune system to battle cancer. *J Clin Invest*. 2015; 125:3335–7. <https://doi.org/10.1172/JCI83871> PMID:26325031
